# Supplementary material for: GABA Production from Buckwheat derived Probiotics (Cytobacillus oceanisediminis): A Promising approach for Neurological Health enhancement Buckwheat-Derived Probiotics for Neurological Benefits
Source: Research Square preprint supplement (doi:10.21203/rs.3.rs-7972296/v1), 2025-11-11
Supplement: Supplementary file 1 [file 2d4bec5ec55347df472231ab.docx]

**Supplementary table:**

| **Concentration (µg)** | **% of Reducing** | **Standard value** |
| --- | --- | --- |
| 25 | 0.22±0.02 | 8.10±0.37 |
| 50 | 25.12±2.10 | 39.55±0.10 |
| 75 | 30.95±0.67 | 61.22±0.07 |
| 100 | 51.54±0.99 | 89.88±0.53 |
| 250 | 59.40±1.21 | 96.65±0.74 |
| 500 | 72.53±0.70 | 97.30±0.42 |
| 750 | 74.45±0.18 | 97.88±0.57 |
| 1000 | 87.12±0.40 | 98.81±0.51 |

**Table. 1** FRAP activity of probiotic isolate G4

| **Concentration (µg)** | **% of Scavenging** | **Standard value** |
| --- | --- | --- |
| 25 | 9.29±1.21 | 14.95±0.43 |
| 50 | 27.24±0.68 | 28.11±0.12 |
| 75 | 49.81±1.46 | 48.96±0.99 |
| 100 | 53.32±3.04 | 64.37±0.37 |
| 250 | 62.67±1.63 | 76.95±0.21 |
| 500 | 66.62±0.53 | 86.46±0.49 |
| 750 | 78.76±1.80 | 93.14±0.34 |
| 1000 | 84.35±0.17 | 94.73±0.63 |

**Table. 2** Hydrogen peroxide scavenging activity of probiotic isolate G4

| **Concentration (µg)** | **% of Reducing** | **Standard value** |
| --- | --- | --- |
| 25 | 0.08±0.002 | 3.43±0.5 |
| 50 | 16.05±0.69 | 24.20±0.7 |
| 75 | 24.63±0.10 | 34.73 |
| 100 | 35.26±0.51 | 63.38±0.25 |
| 250 | 41.38±0.47 | 76.72±0.25 |
| 500 | 56.58±0.90 | 92.14±0.75 |
| 750 | 68.36±0.81 | 95.51±0.5 |
| 1000 | 78.61±0.69 | 97.75±0.5 |

**Table. 3** Reducing power of probiotic isolate G4

| **Concentration (µg)** | **% of Phosphomolybdenum Reduction** | **Standard value** |
| --- | --- | --- |
| 25 | 12.96±0.23 | 18.67±0.47 |
| 50 | 15.18±0.36 | 47.79±0.52 |
| 75 | 21.87±0.77 | 58.72±0.07 |
| 100 | 29.92±0.41 | 75.09±0.71 |
| 250 | 40.32±0.54 | 84.81±0.83 |
| 500 | 50.47±1.23 | 95.27±0.37 |
| 750 | 61.00±0.71 | 98.00±0.39 |
| 1000 | 68.11±0.60 | 99.07±0.87 |

**Table. 4** Phosphomolybdenum assay of probiotic isolate G4

| **Concentration (µg)** | **% of Inhibition** | **Standard value** |
| --- | --- | --- |
| 25 | 60.23±0.19 | 11.90±0.008 |
| 50 | 68.44±0.34 | 33.96±0.01 |
| 75 | 73.70±0.73 | 50.99±0.63 |
| 100 | 84.43±1.52 | 84.61±0.97 |
| 250 | 89.09±2.05 | 95.06±0.03 |
| 500 | 93.74±2.11 | 96.04±0.26 |
| 750 | 96.05±3.85 | 99.07±0.38 |
| 1000 | 97.08±4.14 | 99.46±0.67 |

**Table. 5** Albumin denaturation assay of probiotic isolate G4

| **Concentration (µg)** | **% of Inhibition** | **Standard value** |
| --- | --- | --- |
| 25 | 6.36±0.61 | 18.76±0.65 |
| 50 | 14.23±2.49 | 42.58±0.41 |
| 75 | 39.37±3.67 | 50.26±0.48 |
| 100 | 62.80±1.84 | 73.91±0.22 |
| 250 | 87.24±0.38 | 83.90±0.08 |
| 500 | 91.45±0.76 | 88.46±0.008 |
| 750 | 92.35±0.07 | 94.91±0.10 |
| 1000 | 94.57±0.35 | 99.41±0.35 |

**Table. 6** Heat induced hemolysis assay of probiotic isolate G4

| **pH** | **OD at 600nm** |
| --- | --- |
| 1 | 0 |
| 2 | 0 |
| 3 | 0.0092 |
| 4 | 0.5173 |
| 5 | 1.9587 |
| 6 | 1.998 |
| 7 | 1.2604 |

**Table. 7** pH tolerance test

| **NaCl Concentration (%)** | **OD at 600nm** |
| --- | --- |
| 2 | 1.85 |
| 4 | 0.0932 |
| 6 | 0.003 |
| 8 | 0 |
| 10 | 0 |

**Table. 8** Effect of NaCl on probiotic isolate G4

| **Bile Salt Concentration (%)** | **OD at 600nm** |
| --- | --- |
| 0.05 | 0.9706 |
| 0.15 | 0.0739 |
| 0.3 | 0.0048 |

**Table. 9** Effect of Bile salt on probiotic isolate G4

| **Phenol Concentration (%)** | **OD at 600nm** |
| --- | --- |
| 0.1 | 0.0306 |
| 0.2 | 0.0016 |
| 0.4 | 0 |

**Table. 10** Effect of phenol on probiotic isolate G4

.

| **Drug Treatment** | **Number of Sectional Crossing** | **No. of Rearing** | **No. of Assisted Rearing** |
| --- | --- | --- | --- |
| Vehicle Control  0.1% CMC (10ml/kg) | 32.27±2.27 | 7.20±0.55 | 14.27±1.05 |
| Reference Control  Imipramine (30mg/kg) | 75.62±5.10*** | 21.30±2.01*** | 29.88±1.86*** |
| Test Compound (1 × 10⁸ CFU/mouse/day, p.o) | 48.20±2.71** | 10.56±0.82** | 20.42±1.56** |
| Fermented Foxtail Millet (200 mg, p.o) | 68.31±4.44*** | 15.34±0.90*** | 25.80±2.30*** |

Values are in mean ± SEM (n=6),

*P<0.05, **P<0.01, ***P<0.001 Vs Vehicle Control

**Table. 11** Effect of test compound on Open Field Exploratory Test in mice

| **Drug**  **Treatment** | **Latency Time**  **(Secs)** | **Immobility Time (Secs)** | **Activity Score** |
| --- | --- | --- | --- |
| Vehicle Control  0.1% CMC (10ml/kg) | 27.22±1.17 | 71.62±9.24 | 55.35±4.25 |
| Reference Control  Imipramine (30mg/kg) | 6.20±0.27*** | 24.33±1.02*** | 146.71±8.20*** |
| Test Compound (1 × 10⁸ CFU/mouse/day, p.o) | 16.34±0.98** | 42.85±6.66** | 107.20±7.76*** |
| Fermented Foxtail Millet (200 mg, p.o) | 9.70±0.82*** | 38.35±2.97*** | 139.24±8.95*** |

Values are in mean±SEM (n=6);

*P<0.05, **P<0.01 and ***P<0.001 Vs Vehicle Control
**Table. 12** Effect of test compound on tail suspension test (Immobility time), novelty suppressed feeding test (Latency time) and spontaneous motor activity (activity score)

| **Drug Treatment** | **Learned Helplessness** | |
| --- | --- | --- |
| **Escape Failure** | **Avoidance Response** |
| Vehicle Control  0.1% CMC (10ml/kg) | 24.72±1.75 | 5.22±0.36 |
| Reference Control  Imipramine (30mg/kg) | 6.70±0.55*** | 23.26±1.97*** |
| Test Compound (1 × 10⁸ CFU/mouse/day, p.o) | 13.43±1.06*** | 16.59±1.42*** |
| Fermented Foxtail Millet (200 mg, p.o) | 9.16±0.80*** | 20.80±1.42*** |

Values are in mean ± SEM (n=6),

*P<0.05, **P<0.01, ***P<0.001 Vs Vehicle Control

**Table. 13** Effect of test compound on CAR test in mice

| **Drug Treatment** | **Catecholamine levels in brain**  **(ng/100mg of brain tissue)** | | |
| --- | --- | --- | --- |
| **Noradrenaline** | **Dopamine** | **Serotonin** |
| Normal Control | 35.87±2.21 | 7.78±0.62 | 16.12±0.93 |
| Vehicle Control  0.1% CMC (10ml/kg) | 14.95±1.22 | 3.91±0.16 | 7.94±0.51 |
| Reference Control  Imipramine (30mg/kg) | 34.67±2.20*** | 7.59±0.55*** | 15.94±1.07*** |
| Test Compound (1 × 10⁸ CFU/mouse/day, p.o) | 25.35±1.69** | 6.04±0.30** | 11.88±0.37** |
| Fermented Foxtail Millet (200 mg, p.o) | 30.32±2.08*** | 7.02±0.61*** | 14.66±1.26*** |

Values are in mean±SEM (n=6);

*P<0.05, **P<0.01 and ***P<0.001 Vs Vehicle Control

**Table. 14** Effect of test compound on catecholamine levels in brain

| **Drug Treatment** | **Plasma Concentrations** | | |
| --- | --- | --- | --- |
| **Nitrates**  **(µg/ml)** | **Corticosterone (ng/ml)** | **Glucose (mg/dl)** |
| Normal Control | 25.35±1.50 | 65.21±4.80 | 90.64±5.32 |
| Vehicle Control  0.1% CMC (10ml/kg) | 55.37±3.20 | 120.30±8.50 | 171.58±9.80 |
| Reference Control  Imipramine (30mg/kg) | 26.21±1.82*** | 68.51±6.07*** | 98.57±6.20*** |
| Test Compound (1 × 10⁸ CFU/mouse/day, p.o) | 32.24±1.57** | 78.22±6.34** | 119.75±7.90** |
| Fermented Foxtail Millet (200 mg, p.o) | 29.44±2.05*** | 70.02±5.55*** | 94.27±3.24*** |

Values are in mean±SEM (n=6);

*P<0.05, **P<0.01 and ***P<0.001 Vs Vehicle Control

**Table. 15** Effect of test compound on plasma nitrates, corticosterone and glucose levels in rats
